# Supplementary material
Source: publisher figshare collection journal article supplement (https://acs.figshare.com/ndownloader/files/4463779)
Supplement: Supplementary file 1 [file 4463779]

# U(VI) Sorption and Reduction by Fe(II) Sorbed on Montmorillonite

(Total number of pages for SI: 6)

SUDIPTA CHAKRABORTY, <sup>§,∞,\*</sup> FABIENNE F. BOIVIN, <sup>§,†</sup> DIPANJAN BANERJEE, <sup>§</sup>

ANDREAS C. SCHEINOST, <sup>§</sup> MARTINE MULLET, <sup>#</sup> JEAN-JACQUES EHRHARDT, <sup>#</sup>

JOCELYNE BRENDLE, <sup>‡</sup> LOÏC VIDAL, <sup>‡</sup> AND LAURENT CHARLET <sup>§</sup>

<sup>§</sup>LGIT-OSUG, University of Grenoble-I, Grenoble, France

<sup>§</sup>Institute of Radiochemistry, FZD, Dresden, Germany

<sup>#</sup>LCPME, Université Henri Poincaré Nancy 1, France

<sup>‡</sup> Institut de Science des Matériaux de Mulhouse, LRC CNRS 7228, Université de Haute  
Alsace, Mulhouse, France

<sup>∞</sup>Department of Chemistry, Kanchrapara College, Kanchrapara 743145, West Bengal, India

<sup>†</sup>Ecole d'ingénieurs et d'architectes de Fribourg, HES-SO, CH-1705, Fribourg

\* CORRESPONDING AUTHOR

Phone: +91 33 2585 8790; fax: +91 33 2826 3164; e-mail: chakrabortysudipta@hotmail.com

## S1. Kinetic redox experiments

Fe(II)–U(VI) redox kinetics in the presence of  $4.5 \text{ gL}^{-1}$  MONT was studied in a closed reactor at room temperature with  $0.05 \text{ M}$   $\text{CaCl}_2$  background electrolyte to minimize the exchange of interlayer cation by Fe(II) (*I*). The pH and Eh of the suspension were monitored in the suspension with a glass electrode and platinum electrode respectively both linked to a pH meter (Metrohm 781 pH/Ion Meter). The clay stock suspension was added to  $0.05 \text{ M}$   $\text{CaCl}_2$  ionic background solution and equilibrated overnight in a  $350 \text{ ml}$  glass reactor (with three neck, two for pH and Eh electrodes insertion and one for stock solution/suspension addition) wrapped with aluminium foil. Subsequently  $0.7 \text{ mM}$  Fe(II) solution was added and equilibrated for  $72 \text{ h}$  either at pH  $6.2$ ,  $7.5$  or  $8.5$  before addition of U(VI). Preliminary results (data not shown) on Fe(II) sorption do not show any difference between  $3 \text{ days}$  (in present study) and one week ( $2$ ) equilibration with MONT prior to U(VI) addition. At time zero an aliquot of U(VI) stock solution was added to obtain an initial solution concentration of  $0.04 \text{ mM}$  and pH was readjusted. Given the reaction periods, a  $10 \text{ ml}$  sample of suspension was filtered through a  $0.22\text{-}\mu\text{m}$  membrane filter syringe and analyzed for total Fe ( $\text{Fe}_\text{T}$ ) and total U ( $\text{U}_\text{T}$ ) concentrations in the filtrates. After filtration, the wet pastes were mounted into Teflon sample holders (SH01B) and sealed with Kapton tape for XAS measurements, immediately shock-frozen and transported in a Dewar filled with liquid  $\text{N}_2$ . At the beamline, samples were transferred within  $2 \text{ min}$  from the Dewar to closed-cycle He cryostat and cooled to  $15 \text{ K}$  within less than  $20 \text{ min}$ . At the XPS facility, the samples (as wet pastes) were transferred within  $1 \text{ min}$  from the Dewar to the vacuum chamber. The control sample (without Fe) containing clay and U(VI) was prepared at pH  $5.9$  in  $50 \text{ ml}$  vials by batch method (Table 1).

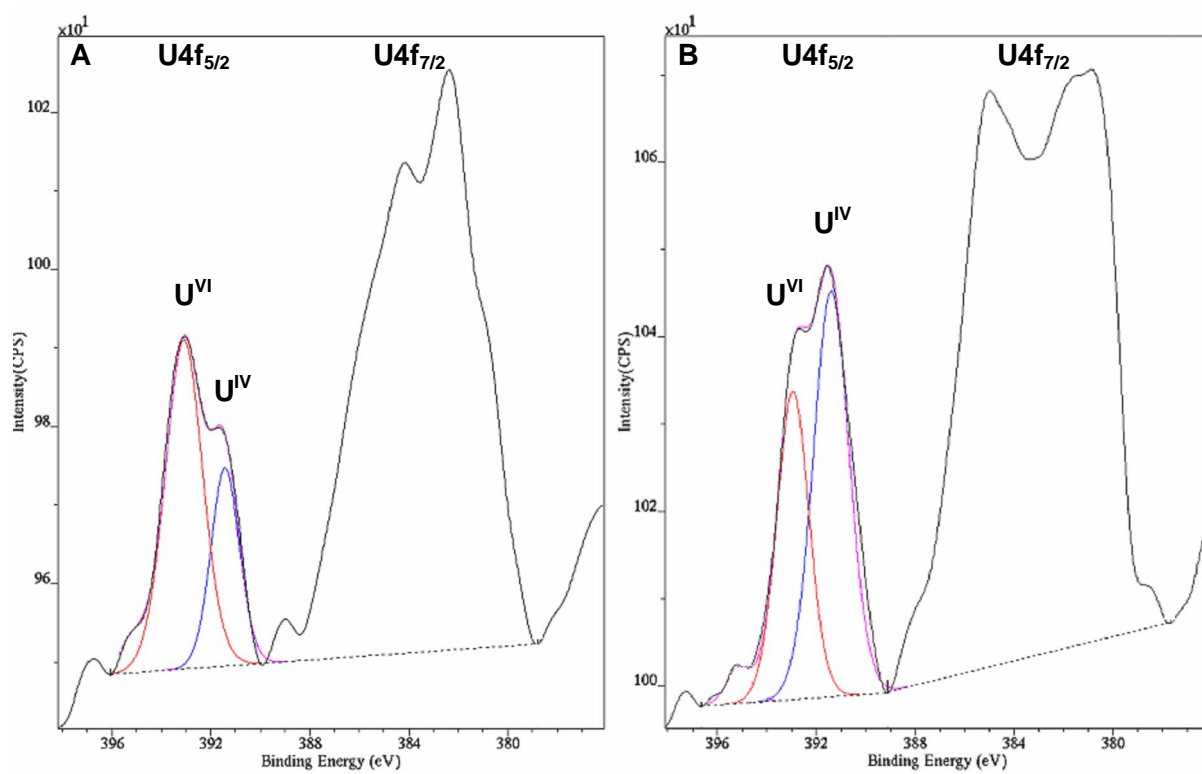

**FIGURE S2.**U4f XPS spectra of samples UF1 (A) and UF3 (B) recorded from kinetic experiment of U(VI) sorption onto MONT in presence of Fe(II) at initial pH 7.5.

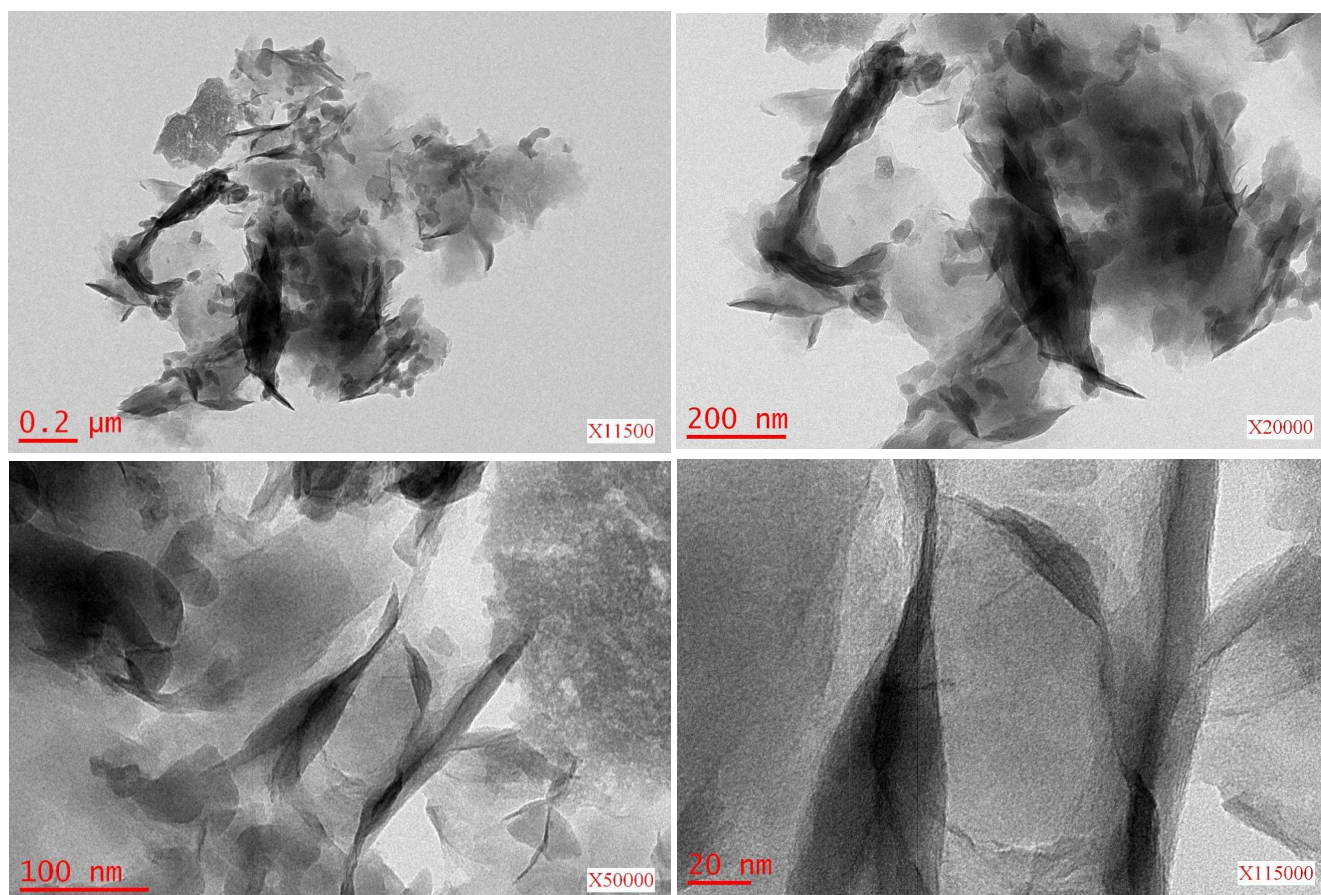

**FIGURE S3.** TEM micrographs of sample UF3 at different magnifications showing no formation/precipitation of mixed valence solids  $\text{U}_3\text{O}_8/\beta\text{-U}_3\text{O}_7/\text{U}_4\text{O}_9$ .

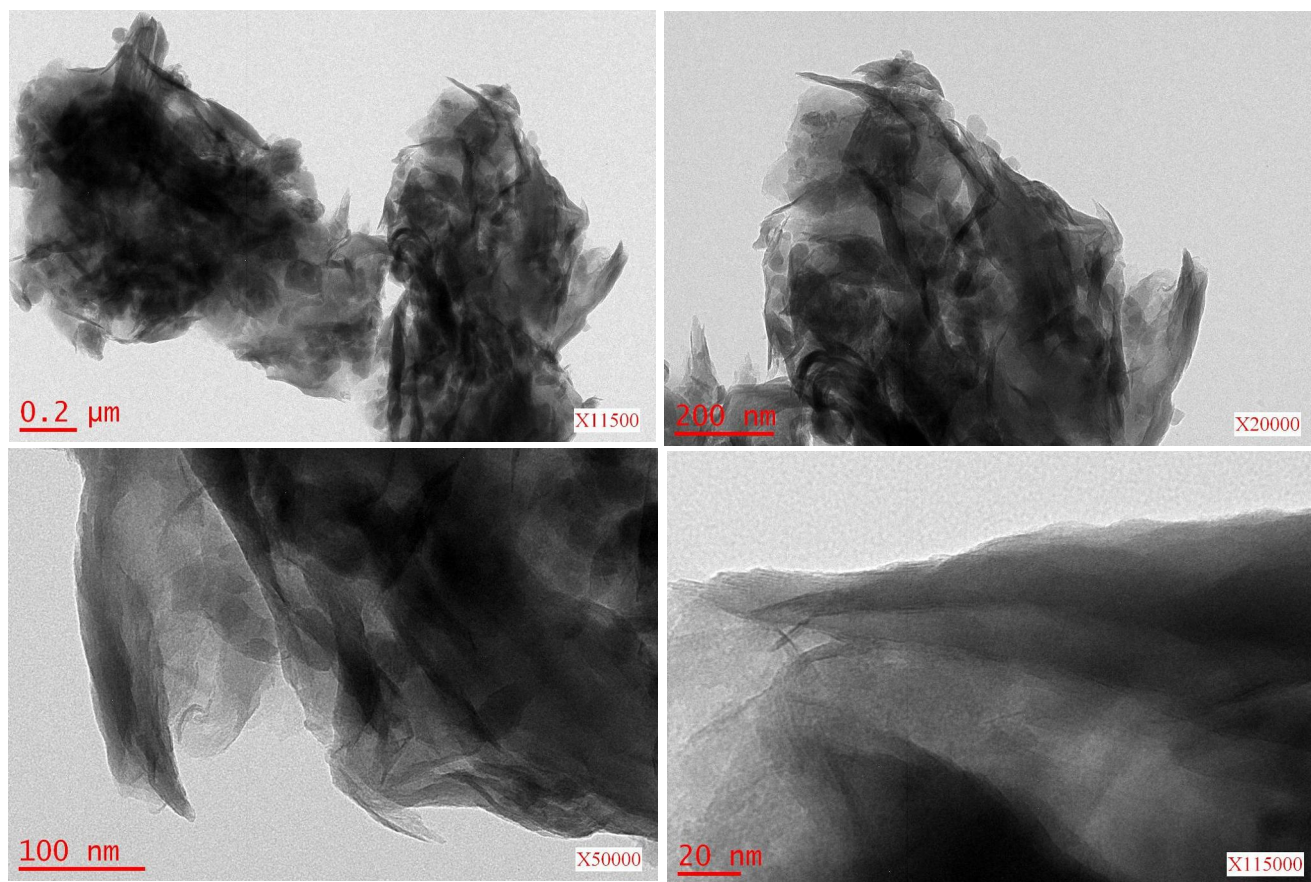

**FIGURE S4.** TEM micrographs of sample U3 at different magnifications showing no uranium bearing solid phase formation.

## S5. Literature cited

- (1) Charlet, L.; Tournassat, C. Fe(II)–Na(I)–Ca(II) cation exchange on montmorillonite in chloride medium; evidence for preferential clay adsorption of chloride–metal ion pairs in seawater. *Aquat. Geochem.* **2005**, *11*, 115–137.
- (2) Charlet, L.; Scheinost, A. C.; Tournassat, C.; Greneche, J. M.; Géhin, A.; Fernández-Martínez, A.; Coudert, S.; Tisserand, D.; Brendle, J. Electron transfer at the mineral/water interface: selenium reduction by ferrous iron sorbed on clay. *Geochim. Cosmochim. Acta* **2007**, *71*, 5731-5749.
